# Supplementary material
Source: PubMed Central journal article supplement (PMC5829963)

SUPPLEMENTARY DATA

**Supplementary Table 1.** Allele frequencies across the study population

|                    | CC (n, %) | CT (n, %) | TT (n, %) | Allele Frequency<br>“C” | Allele Frequency<br>“T” |
|--------------------|-----------|-----------|-----------|-------------------------|-------------------------|
| Total              | 311 (51)  | 242 (40)  | 55 (9.0)  | 71.1%                   | 28.9%                   |
| Non-Hispanic White | 186 (46)  | 180 (44)  | 41 (10)   | 67.8%                   | 32.2%                   |
| Non-Hispanic Black | 71 (56)   | 49 (38.5) | 7 (5.5)   | 75.2%                   | 24.8%                   |
| Hispanic           | 22 (61)   | 10 (28)   | 4 (11)    | 75%                     | 25%                     |
| Asian              | 32 (84)   | 3 (8)     | 3 (8)     | 88.2%                   | 11.8%                   |

**Supplementary Figure 1.** Plasma fasting glucose levels across genotypes at visit 1 and visit 2, n=608 (CC=311, CT=242, TT=55).

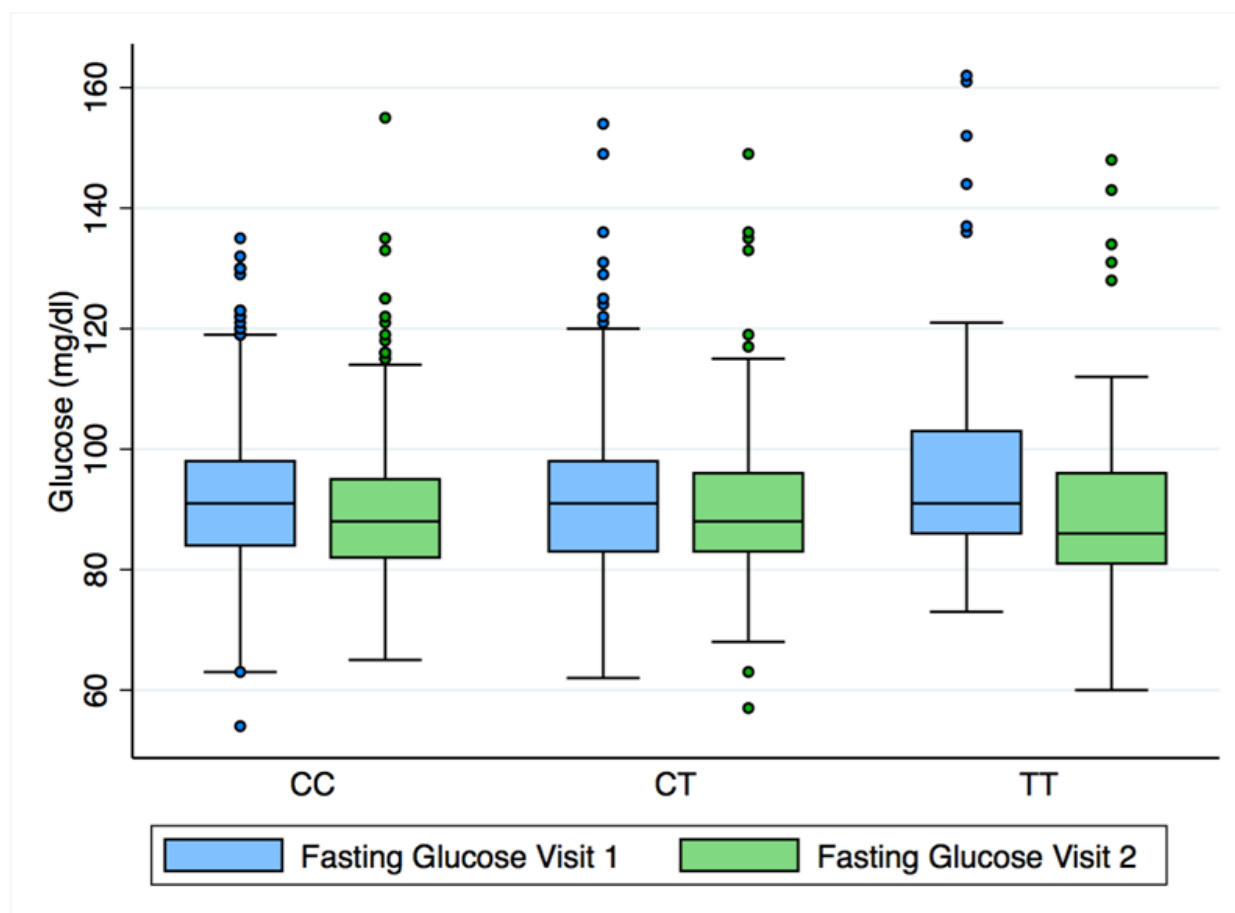

Supplement: DC171386SupplementaryData.pdf [file DC171386SupplementaryData.pdf]
